# Supplementary material
Source: PubMed Central journal article supplement (PMC4461231)
Supplement: NIHMS694382-supplement-Figure_legend.pdf [file NIHMS694382-supplement-Figure_legend.pdf]

## Supplemental Figure Legends:

**Supplemental Figure 1: (a) Histone H3 acetylation at the proximal promoter of *Pdx1* in 9 month islets.** ChIP analysis of cross-linked chromatin from islets of IUGR and control animals with and without Ex-4 treatment at 9 months of age, immunoprecipitated with antibody to acetylated H3. The relative amount of acetylated H3 bound at the *Pdx1* promoter was measured by QPCR and normalized to total input DNA for each experimental group. Data are represented as fold change relative to control vehicle values. N=6 animals, data are  $\pm$  SEM. (a) \*  $p=0.033$ , IV vs. IEx; † $p=0.025$ , IV vs. CV;  $p > 0.05$ , IEx vs. CV and CV vs. CEx. **(b) Histone H3 acetylation at the proximal promoter of *Pdx1* in 12 month islets.** ChIP analysis of cross-linked chromatin from islets of IUGR and control animals with and without Ex-4 treatment at 12 months of age, immunoprecipitated with antibody to acetylated H3. The relative amount of acetylated H3 bound at the *Pdx1* promoter was measured by QPCR and normalized to total input DNA for each experimental group. Data are represented as fold change relative to control vehicle values. N=4 animals, data are  $\pm$  SEM. (a) \*  $p=0.003$ , IV vs. IEx; † $p=0.039$ , IV vs. CV; ‡ $p=0.04$ , IEx vs. CV;  $p > 0.05$ , CV vs. CEx. **(c) H3K4 trimethylation at the proximal promoter of *Pdx1* in 9 month islets.** ChIP analysis of cross-linked chromatin from islets of IUGR and control animals with and without Ex-4 treatment immunoprecipitated with antibody to H3k4me3 at 9 months of age of age. The relative amount of H3K4me3 bound at the *Pdx1* promoter was measured by QPCR and normalized to total input DNA for each experimental group. Data are represented as fold change relative to control vehicle values. N=6 animals, data are  $\pm$  SEM. \*  $p=0.038$ , IV vs. IEx; † $p=0.009$ , IV vs. CV;  $p > 0.05$ , IEX vs. CV and CV vs. CEx. **(d) H3K4 trimethylation at the proximal promoter of *Pdx1* in 12 month islets.** ChIP analysis of cross-linked chromatin from islets of IUGR and control animals with and without Ex-4 treatment immunoprecipitated with antibody to H3k4me3 at 12 months of age of age. The relative amount of H3K4me3 bound at the *Pdx1* promoter was measured by QPCR and normalized to total input DNA for each experimental group. Data are represented as fold change relative to control vehicle values. N=4 animals, data are  $\pm$  SEM. \*  $p=0.036$ , IV vs. IEx; † $p=0.023$ , IV vs. CV;  $p > 0.05$ , IEx vs. CV and CV vs. CEx. **(e) H3K9 dimethylation at the proximal promoter of *Pdx1* in 9 month islets.** ChIP analysis of cross-linked chromatin from islets of IUGR and control animals with and without Ex-4 treatment immunoprecipitated with antibody to H3K9me2 at 9 months of age of age. The relative amount of H3K9me2 bound at the *Pdx1* promoter was measured by QPCR and normalized to total input DNA for each experimental group. Data are represented as fold change relative to control vehicle values. N=6 animals, data are  $\pm$  SEM. \*  $p=0.033$ , IV vs. IEx; † $p=0.035$ , IV vs. CV;  $p > 0.05$ , IEx vs. CV and CV vs. CEx. **(f) H3K9 dimethylation at the proximal promoter of *Pdx1* in 12 month islets.** ChIP analysis of cross-linked chromatin from islets of IUGR and control animals with and without Ex-4 treatment immunoprecipitated with antibody to H3K9me2 at 9 months of age of age. The relative amount of H3K9me2 bound at the *Pdx1* promoter was measured by QPCR and normalized to total input DNA for each experimental group. Data are represented as fold change relative to control vehicle values. N=6 animals, data are  $\pm$  SEM. \*  $p=0.035$ , IV vs. IEx; † $p=0.037$ , IV vs. CV;  $p > 0.05$ , IEx vs. CV and CV vs. CEx.

**Supplemental Figure 2:** Antibody binding at the promoter of  $\beta$ -Actin. a) ChIP analysis of cross-linked chromatin from islets of IUGR and control animals with and without Ex-4 treatment at 1 week of age immunoprecipitated with antibody to USF1. The relative amount of USF1 bound at the  $\beta$ -Actin promoter was measured by QPCR and normalized to total input DNA. Data are represented as percent of control vehicle values. N= 3 experiments, data are  $\pm$  SEM; (a)  $p > 0.10$  IV vs IEx; IV vs. CV; IEx vs. CV; CV vs. CEx. (b) ChIP analysis of cross-linked chromatin from adult islets of IUGR and control animals with and without Ex-4 treatment immunoprecipitated with antibody to Ach3. The relative amount of Ach3 bound at the  $\beta$ -Actin promoter was

measured by QPCR and normalized to total input DNA. Data are represented as percent of control vehicle values. N= 3 experiments, data are  $\pm$  SEM;  $p > 0.10$ , IV vs. IEx; IV vs. CV; IEx vs. CV; and CV vs. CEx. (c) ChIP analysis of cross-linked chromatin from adult islets of IUGR and control animals with and without Ex-4 treatment immunoprecipitated with antibody to H3K4me3. The relative amount of H3K4me3 bound at the  $\beta$ -Actin promoter was measured by QPCR and normalized to total input DNA. Data are represented as percent of control vehicle values. N=3 experiments, data are  $\pm$  SEM;  $p > 0.10$ , IV vs IEx; IV vs. CV; IEx vs. CV; and CV vs. CEx.

**Supplemental Figure 3:** Methylation of individual CpG dinucleotides within the promoter of *Pdx1*, displayed in following order: IV, IEx, CV, CEx.  $P < 0.05$  between IV and all other groups.
