# Supplementary material
Source: PubMed Central journal article supplement (PMC4461231)
Supplement: NIHMS694382-supplement-Table_1.pdf [file NIHMS694382-supplement-Table_1.pdf]

**Supplemental Table 1:**

**(a) Histone 3 acetylation in adult animals: Comparison between 9 and 12 month old islets**

|            | <b>9 month mean</b> | <b>12 month mean</b> | <b>P value</b> |
|------------|---------------------|----------------------|----------------|
| <b>IV</b>  | <b>0.44</b>         | <b>0.40</b>          | <b>0.75</b>    |
| <b>IEx</b> | <b>1.31</b>         | <b>2.20</b>          | <b>0.04</b>    |
| <b>CEx</b> | <b>1.62</b>         | <b>1.72</b>          | <b>0.84</b>    |

**(b) H3K4 trimethylation in adult animals: Comparison between 9 and 12 month old islets**

|            | <b>9 month mean</b> | <b>12 month mean</b> | <b>P value</b> |
|------------|---------------------|----------------------|----------------|
| <b>IV</b>  | <b>0.38</b>         | <b>0.265</b>         | <b>0.27</b>    |
| <b>IEx</b> | <b>1.43</b>         | <b>2.45</b>          | <b>0.10</b>    |
| <b>CEx</b> | <b>1.88</b>         | <b>2.10</b>          | <b>0.82</b>    |

**(c) H3K9 dimethylation in adult animals: Comparison between 9 and 12 month old islets**

|            | <b>9 month mean</b> | <b>12 month mean</b> | <b>P value</b> |
|------------|---------------------|----------------------|----------------|
| <b>IV</b>  | <b>4.98</b>         | <b>10.79</b>         | <b>0.04</b>    |
| <b>IEx</b> | <b>0.84</b>         | <b>0.57</b>          | <b>0.08</b>    |
| <b>CEx</b> | <b>1.43</b>         | <b>0.86</b>          | <b>0.35</b>    |
