# Supplementary material
Source: PubMed Central journal article supplement (PMC4461231)
Supplement: NIHMS694382-supplement-table_2.pdf [file NIHMS694382-supplement-table_2.pdf]

**Supplemental Table 2: Assessment of relative antibody binding for chromatin immunoprecipitation experiments**

|                | <b>IV</b>     | <b>IEx</b>   | <b>CV</b>    | <b>CEx</b>    |
|----------------|---------------|--------------|--------------|---------------|
| <b>AcH3</b>    | <b>1.9</b>    | <b>21.5</b>  | <b>97.0</b>  | <b>128.7</b>  |
| <b>H3K4me3</b> | <b>3536.3</b> | <b>146.1</b> | <b>142.9</b> | <b>3524.3</b> |
| <b>USF-1</b>   | <b>1348.9</b> | <b>50.8</b>  | <b>246.1</b> | <b>502.1</b>  |
| <b>PCAF</b>    | <b>3.9</b>    | <b>2.9</b>   | <b>15.0</b>  | <b>3.4</b>    |
| <b>IgG</b>     | <b>1.0</b>    | <b>1.0</b>   | <b>1.0</b>   | <b>1.0</b>    |
