# Supplementary material
Source: PubMed Central journal article supplement (PMC4461231)

Supplemental Figure 1

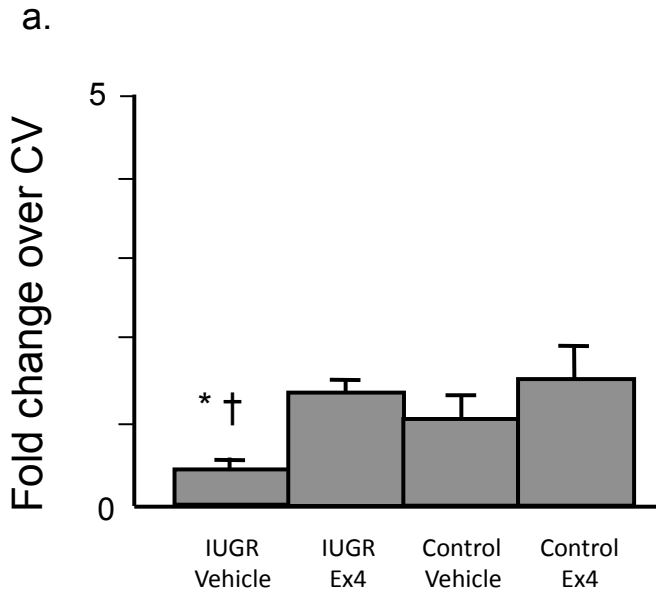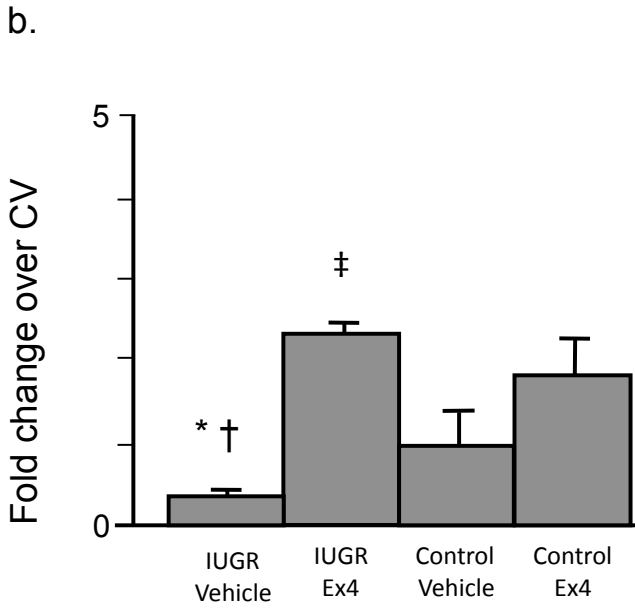

Supplemental Figure 1

c.

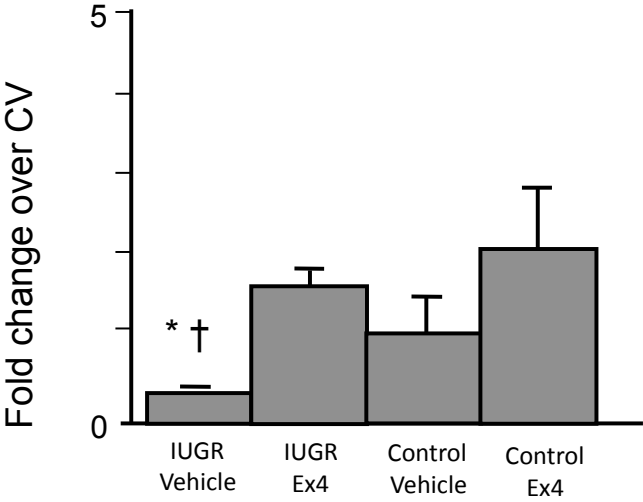

d.

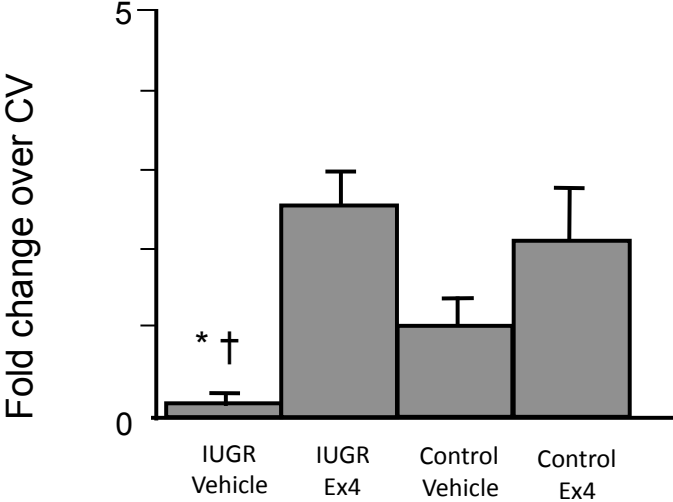

Supplemental Figure 1

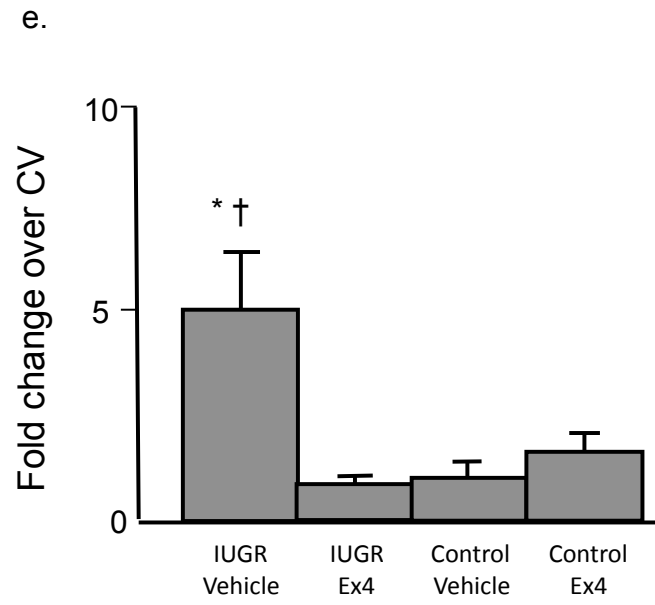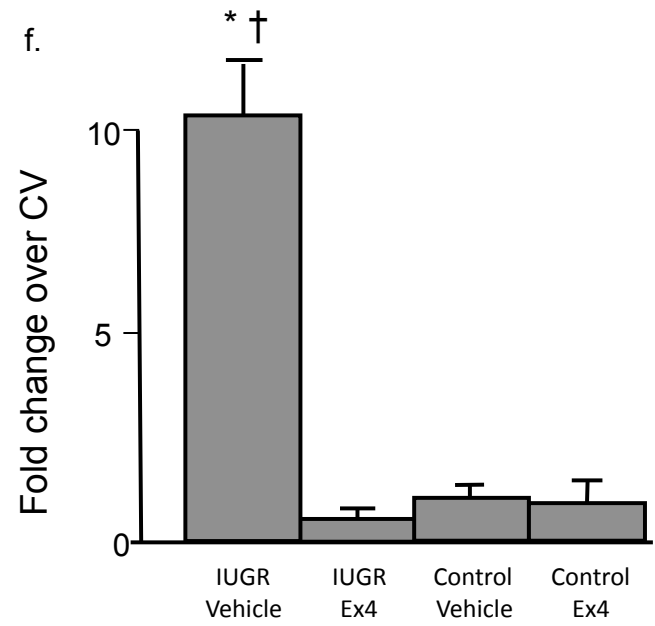

Supplement: NIHMS694382-supplement-Figure_1.pdf [file NIHMS694382-supplement-Figure_1.pdf]

# Supplemental Figure 2

a.

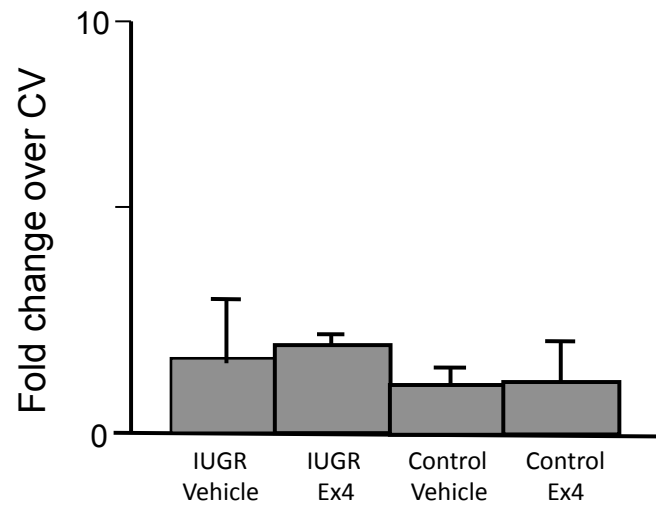

b.

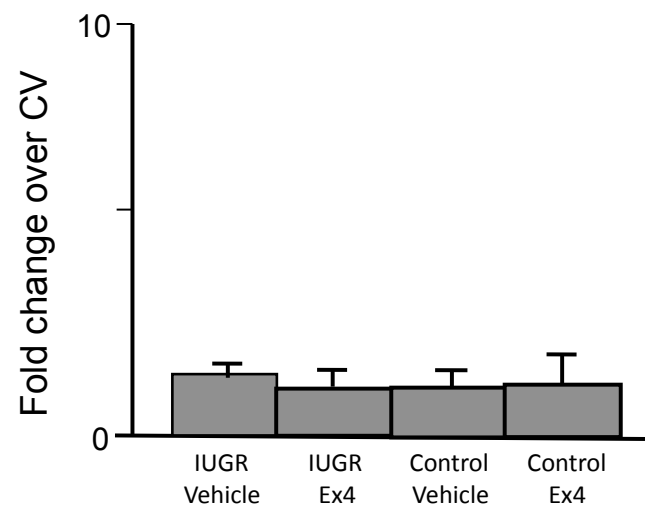

Supplemental Figure 2

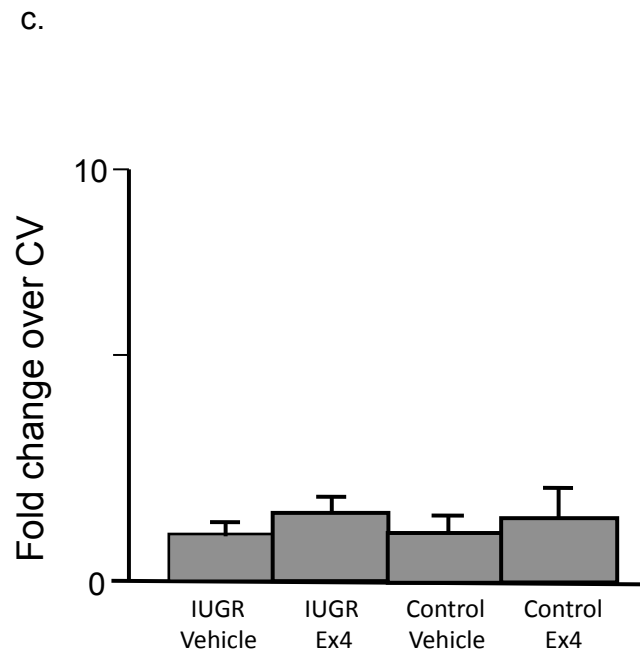

Supplement: NIHMS694382-supplement-Figure_2.pdf [file NIHMS694382-supplement-Figure_2.pdf]

Supplemental Figure 3

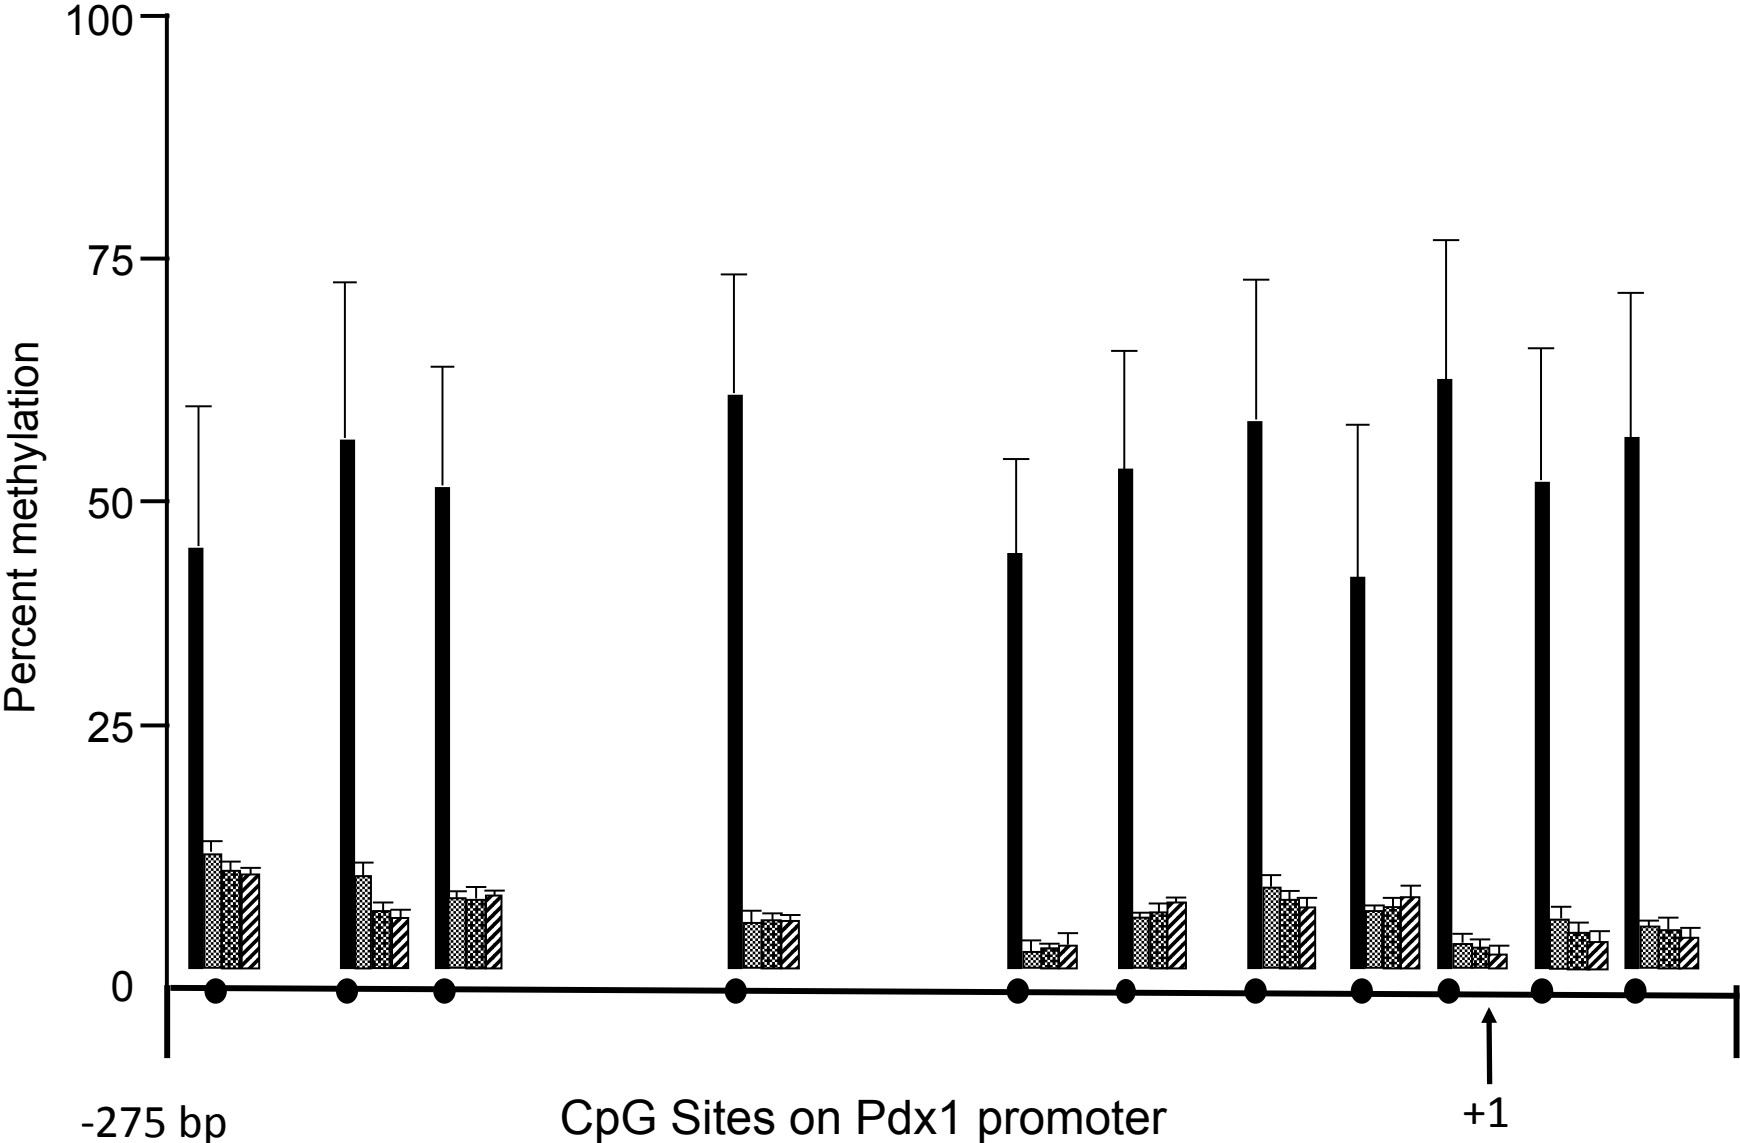

Supplement: NIHMS694382-supplement-Figure_3.pdf [file NIHMS694382-supplement-Figure_3.pdf]
